# Supplementary material for: Distinct element geomechanical modelling of the formation of sinkhole clusters within large-scale karstic depressions
Source: Copernicus journal article supplement (doi:10.5194/se-10-1219-2019), 2019-07-29
Supplement: Supplementary file 1 [file se-10-1219-2019-supplement.zip]

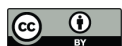

## *Supplement of*

# **Distinct element geomechanical modelling of the formation of sinkhole clusters within large-scale karstic depressions**

**Djamil Al-Halbouni et al.**

*Correspondence to:* Djamil Al-Halbouni (halbouni.etal@posteo.de)

- se-10-1219-2019-supplement-title-page.pdf
- AlluvMud.avi
- CohesiveMud.avi
- MudSalt.avi
- SaltMudAlluv.avi

The copyright of individual parts of the supplement might differ from the CC BY 4.0 License.
